# Supplementary material for: Single-walled carbon nanohorns with unique horn-shaped structures as a scaffold for lithium–sulfur batteries
Source: Royal Society of Chemistry journal article supplement (doi:10.1039/c4ra03693j), 2014-01-01
Supplement: c4ra03693j1.pdf [file c4ra03693j1.pdf]

# Single-walled carbon nanohorns with a unique horn-shaped structure as a scaffold for lithium-sulfur batteries

Wangliang Wu<sup>a,b,c</sup>, Yi Zhao<sup>a,b</sup>, Chuxin Wu<sup>a,b</sup>, Lunhui Guan<sup>a,b\*</sup>

## 1. Experimental section

Preparation of the C-S composite: The C-S composite was prepared via a facile melt-diffusion strategy. SWCNHs used here were produced by a simple arc-discharge method.<sup>1</sup> Typically, carbon material (SWCNHs or MWCNTs) and sulfur with weight ratios of 1:4 were dissolved in 5 ml CS<sub>2</sub> to form a homogeneous solution under ultrasonic radiation. Subsequently, CS<sub>2</sub> was allowed to completely evaporate from the solution under magnetic stir to obtain the C-S composite. The final C-S product was placed in a crucible, then heated to 155 °C and kept at that temperature for 24 h in an argon environment. The composite was denoted as SWCNHs-S or MWCNTs-S.

## 2. Material characterization

The structure and morphology of composites were characterized by X-ray diffraction (XRD, RIGAKU SCXmini), scanning electron microscope (SEM, JSM-6700F), and transmission electron microscope (TEM, Tecnai G2 F20). Thermal gravimetric analysis (TGA, NETZSCH STA449 C) tests were measured from 30 to 600 °C at a heating rate of 10 K min<sup>-1</sup> in a N<sub>2</sub> environment to evaluate the weight content of sulfur in the composites. The nitrogen adsorption/desorption isotherms and the pore size distribution were determined by Brunauer-Emmett-Teller (BET) measurements using an ASAP-2020 surface area analyzer. The pore size distribution was calculated from the desorption data using the Barret-Joyner-Halenda (BJH) modal.

## 3. Electrochemical test

The electrochemical tests were performed via CR2025 coin-type test cells which were fabricated in an argon-filled glove box using lithium metal as the counter electrode and a Celgard 2300 membrane. The cathode slurry was prepared by mixing 80 wt% C-S composite, 10 wt% conducting carbon (ketjen black, KB), and 10 wt% polyvinylidene fluoride (PVDF) in N-methyl-2-pyrrolidone (NMP) solvent dispersant. Positive electrodes were produced by pasting the slurry on Ni foam and then drying at 60 °C for 12 h. The electrolyte solution was 1 M lithium bis(trifluoromethylsulfonyl)imide (LiTFSI) in a mixed solvent of 1,2-dimethoxy ethane (DME) and 1,3-dioxolane (DOL) (a volume ratio of 1 : 1) with 0.25 M lithium nitrate additive (LiNO<sub>3</sub>). The charge-discharge performance of the cells was tested with LAND CT-2001A instrument. The cut-off potentials were 1.9 and 2.7 V at room temperature. Cyclic voltammetry (CV) tests were performed on a CHI660C Electrochemical Workstation. The cut-off potentials were 1.8 and 2.8 V at room temperature. The specific capacity of the electrodes was calculated on the mass of elemental sulfur.

Table 1 Textural characteristic of samples

| Samples  | BET surface area<br>(m <sup>2</sup> g <sup>-1</sup> ) | Total pore volume<br>(cm <sup>3</sup> g <sup>-1</sup> ) |
|----------|-------------------------------------------------------|---------------------------------------------------------|
| SWCNHs   | 203                                                   | 0.48                                                    |
| SWCNHs-S | 0.94                                                  | 0.01                                                    |

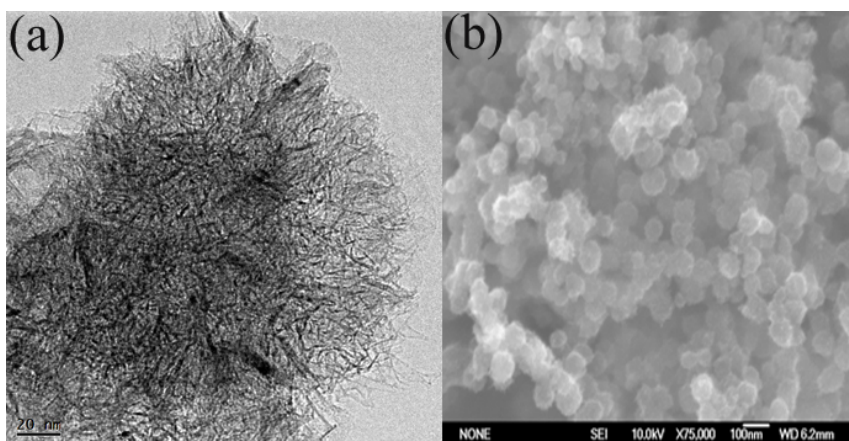

Fig. S1 (a) HRTEM and (b) SEM images of the SWCNHs.

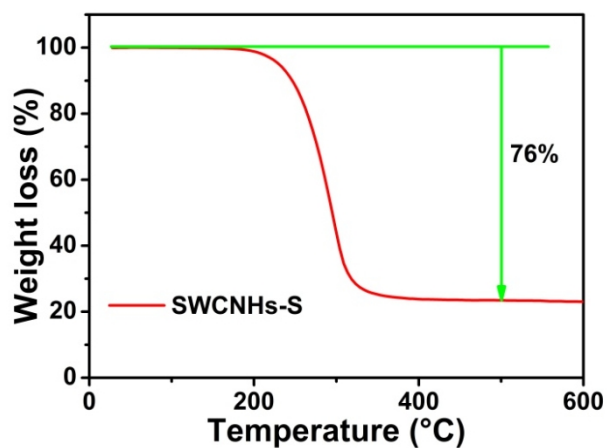

Fig. S2 Thermal analysis curve of the SWCNHs-S.

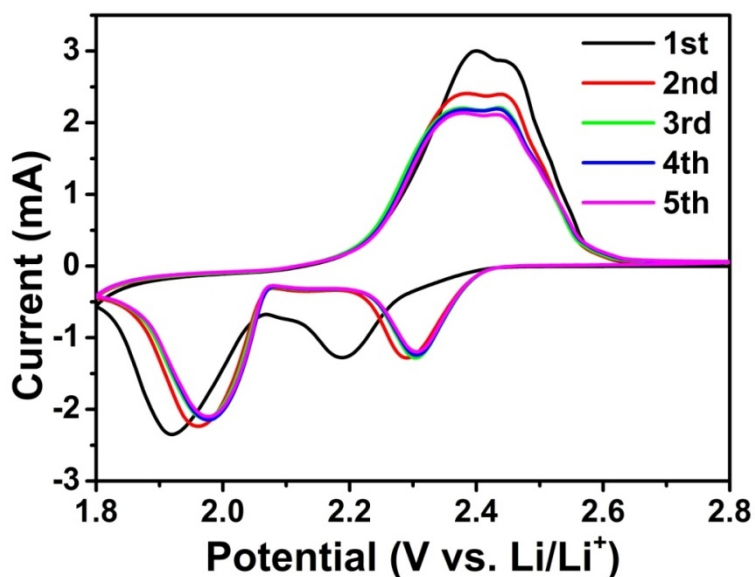

Fig. S3 Cyclic voltammogram of the SWCNHs-S electrode.

As seen in the Fig. S3, the reduction peak shifts to higher potentials and the oxidation peak shifts to lower potentials upon cycling, indicating improved reversibility of the cell.<sup>2</sup> Meanwhile, their peak intensity and integrated area mostly became coincidence in the successive cycles, validating the good cycling performance of the SWCNHs-S electrode.

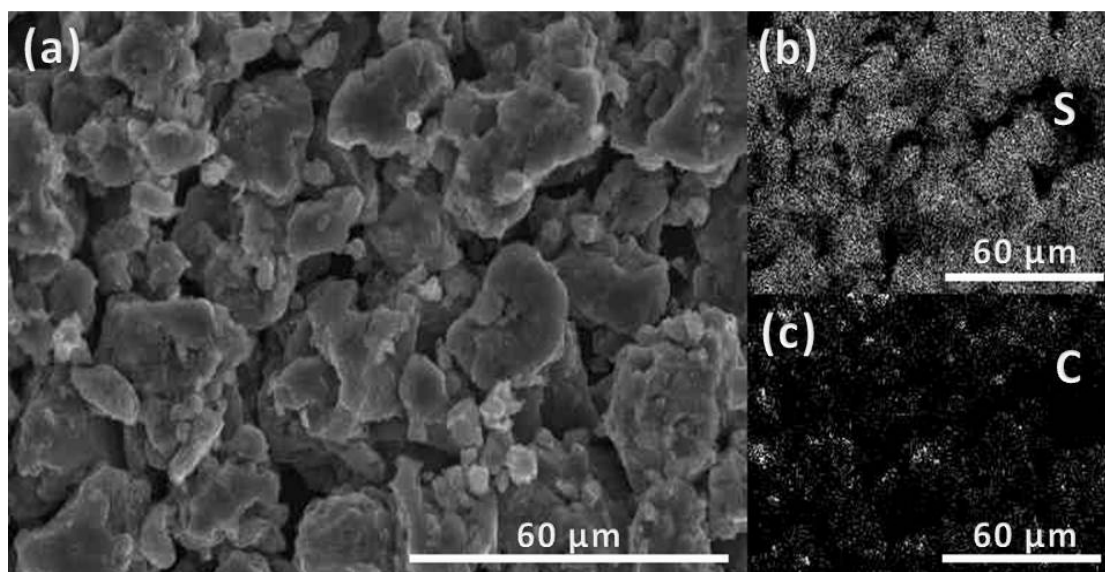

Fig. S4 (a) a low-magnification FESEM image of SWCNHs-S composite; (b) Elemental mapping of sulfur and (c) carbon.

Table 2 Comparison of the performances of the Li-S batteries based on the SWCNHs with those of other typically carbon matrix

| Classification    | BET surface area (m <sup>2</sup> g <sup>-1</sup> ) | Total pore volume (m <sup>3</sup> g <sup>-1</sup> ) | S content (wt %) | Cycle performance of the composites(1C=1675 mA g <sup>-1</sup> )          | Ref.     |
|-------------------|----------------------------------------------------|-----------------------------------------------------|------------------|---------------------------------------------------------------------------|----------|
| SWCNHs            | 203                                                | 0.48                                                | 76               | 693 mAh g <sup>-1</sup> /1600 mA g <sup>-1</sup> /100 <sup>th</sup> cycle | Our work |
| SWCNTs            | 798                                                | 1.72                                                | 55.6             | 441 mAh g <sup>-1</sup> /1 C/100 <sup>th</sup> cycle                      | 1        |
| Graphene          | 598                                                | 2.61                                                | 67               | 424 mAh g <sup>-1</sup> /0.2 C/100 <sup>th</sup> cycle                    | 2        |
|                   | --                                                 | --                                                  | 44.5             | 662 mAh g <sup>-1</sup> /1 C/100 <sup>th</sup> cycle                      | 3        |
|                   | --                                                 | --                                                  | 73               | 615 mAh g <sup>-1</sup> /1C/100 <sup>th</sup> cycle                       | 4        |
| GO                | --                                                 | --                                                  | 66               | 954 mAh g <sup>-1</sup> /0.1C/50 <sup>th</sup> cycle                      | 5        |
| Mesoporous carbon | 1472                                               | 2.28                                                | 57.2             | 878 mAh g <sup>-1</sup> /0.05C/50 <sup>th</sup> cycle                     | 6        |
|                   | 1175                                               | 4.8                                                 | 83.2             | 613 mAh g <sup>-1</sup> /0.1C/50 <sup>th</sup> cycle                      | 7        |

-- These values are not obtained in the literature.

References:

1. S. M. Zhang, Q. Zhang, J. Q. Huang, X. F. Liu, W. Zhu, M. Q. Zhao, W. Z. Qian and F. Wei, *Part. Part. Syst. Charact.*, 2013, **30**, 158-165.
2. N. Li, M. Zheng, H. Lu, Z. Hu, C. Shen, X. Chang, G. Ji, J. Cao and Y. Shi, *Chem Commun (Camb)*, 2012, **48**, 4106-4108.
3. B. Wang, K. Li, D. Su, H. Ahn and G. Wang, *Chemistry, an Asian journal*, 2012, **7**, 1637-1643.
4. T. Lin, Y. Tang, Y. Wang, H. Bi, Z. Liu, F. Huang, X. Xie and M. Jiang, *Energy Environ. Sci.*, 2013, **6**, 1283.
5. L. Ji, M. Rao, H. Zheng, L. Zhang, Y. Li, W. Duan, J. Guo, E. J. Cairns and Y. Zhang, *Journal of the American Chemical Society*, 2011, **133**, 18522-18525.
6. X. Tao, X. Chen, Y. Xia, H. Huang, Y. Gan, R. Wu, F. Chen and W. zhang, *Journal of Materials Chemistry A*, 2013, **1**, 3295.
7. X. Li, Y. Cao, W. Qi, L. V. Saraf, J. Xiao, Z. Nie, J. Mietek, J.-G. Zhang, B. Schwenzer and J. Liu, *Journal of Materials Chemistry*, 2011, **21**, 16603.
